# Supplementary material for: Techniques of TIPS in the treatment of liver cirrhosis combined with incompletely occlusive main portal vein thrombosis
Source: PubMed Central journal article supplement (PMC5020493; doi:10.1038/srep33069), 2016-09-13
Supplement: srep33069-s1.pdf [file srep33069-s1.pdf]

**Techniques of TIPS in the treatment of liver cirrhosis combined with incompletely occlusive main portal vein thrombosis**

Mengfei Zhao, Zhendong Yue, Hongwei Zhao, Lei Wang, Zhenhua Fan, Fuliang He, Jiannan Yao, Xiaoqun Dong, Fuquan Liu

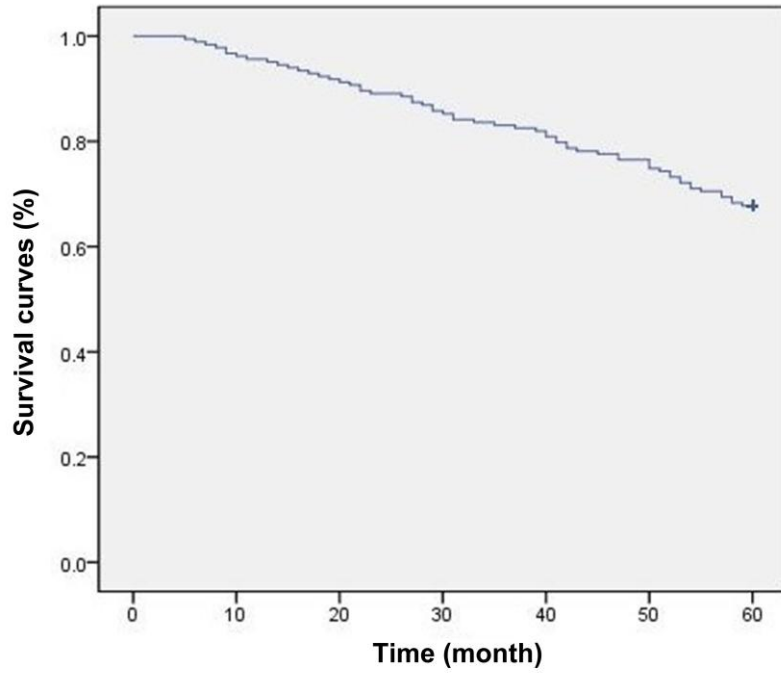

**Number at risk**

183 164 155 146 142 139 124

**Supplementary Figure 1.** Effects of TIPS on overall survival (5-year follow-up) of patients with PVT

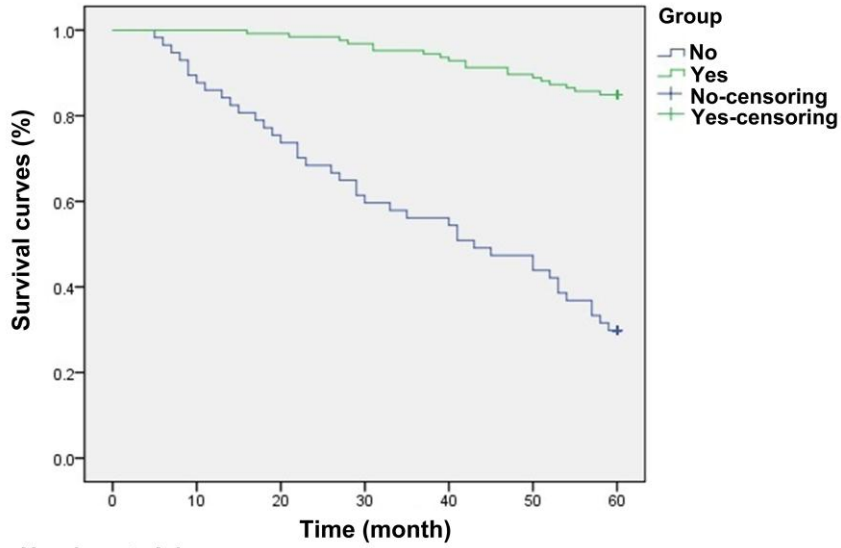

| Number at risk |     | 0   | 10  | 20  | 30  | 40  | 50  | 60 |
|----------------|-----|-----|-----|-----|-----|-----|-----|----|
| Yes            | 126 | 123 | 120 | 119 | 117 | 113 | 107 |    |
| No             | 57  | 51  | 40  | 34  | 29  | 27  | 18  |    |

**Supplementary Figure 2.** Effects of completely patent PV immediately after TIPS (Yes) vs. incompletely patent PV immediately after TIPS (No) on overall survival (5-year follow-up) of patients with PVT

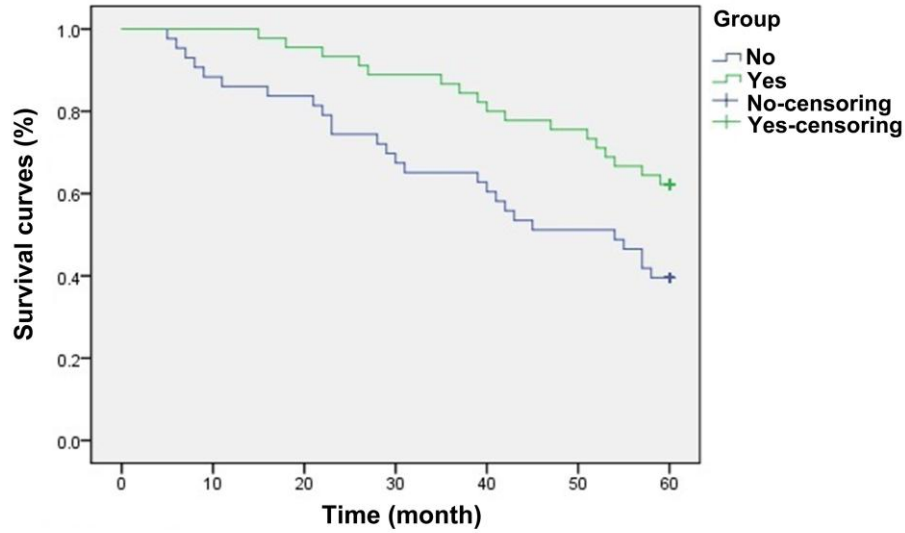

| Number at risk |    |    |    |    |    |    |    |
|----------------|----|----|----|----|----|----|----|
| Yes            | 45 | 43 | 41 | 39 | 32 | 31 | 27 |
| No             | 43 | 37 | 34 | 28 | 24 | 22 | 17 |

**Supplementary Figure 3.** Effects of completely patent mesenteric veins immediately after TIPS (Yes) vs. incompletely patent mesenteric veins immediately after TIPS (No) on overall survival (5-year follow-up) of patients with PVT

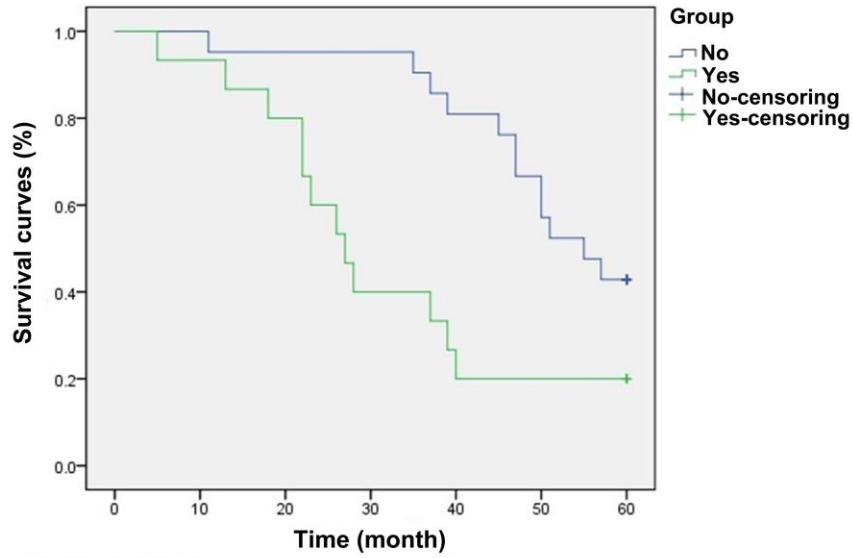

| Number at risk |    | 0  | 10 | 20 | 30 | 40 | 50 | 60 |
|----------------|----|----|----|----|----|----|----|----|
| Yes            | 21 | 19 | 19 | 19 | 15 | 10 | 8  |    |
| No             | 15 | 13 | 9  | 6  | 3  | 3  | 3  |    |

**Supplementary Figure 4.** Effects of completely patent splenic veins immediately after TIPS (Yes) vs. incompletely patent splenic veins immediately after TIPS (No) on overall survival (5-year follow-up) of patients with PVT
